# Supplementary material
Source: Springer Nature journal article supplement (https://www.springermedizin.de/resource/supplementary/12879_2010_1621_MOESM1_ESM.pdf/9442916)
Supplement: MOESM1 [file 9442916]

**Newly diagnosed pulmonary tuberculosis patients  
(72 sputum specimens)**

***BLEACH STERILIZATION  
ASSESSMENT  
(31 sputum specimens)***

***BLEACH-SEDIMENTATION  
ASSESSMENT  
(41 sputum specimens)***

**Sputum sodium  
hydroxide  
decontamination**

**Pilot experiments to  
select optimal bleach-  
sedimentation technique  
(16 sputum specimens)**

**Quantitative evaluation of  
selected bleach-  
sedimentation technique  
(25 sputum specimens)**

**Sputum treated with 4  
bleach concentrations  
& 4 exposure times**

**Triplicate  
conventional  
sputum  
conventional  
-smears**

**Triplicate  
smears of  
bleach-  
sedimented  
sputum**

**Culture to assess *M.  
tuberculosis* sterilization**

**Quantification of acid-fast  
bacilli, slide reading time &  
inter-observer agreement**
